# Supplementary material for: From K6[Re6−xMoxS8(CN)5] Solid Solution to Individual Cluster Complexes: Separation and Investigation of [Re4Mo2S8(CN)6]n− and [Re3Mo3S8(CN)6]n− Heterometallic Clusters
Source: MDPI journal article supplement (doi:10.3390/molecules28155875), 2023-08-04
Supplement: s1 [file s1]

# From $K_6[Re_{6-x}Mo_xS_8(CN)_5]$ Solid Solution to Individual Cluster Complexes: Separation and Investigation of $[Re_4Mo_2S_8(CN)_6]^{n-}$ and $[Re_3Mo_3S_8(CN)_6]^{n-}$ Heterometallic Clusters

Tatiana I. Lappi <sup>1</sup>, Yakov M. Gayfulin <sup>1</sup>, Adèle Renaud <sup>2</sup>, Carmelo Prestipino <sup>2</sup>, Pierric Lemoine <sup>3</sup>, Vadim V. Yanshole <sup>4</sup>, Viktoria K. Muravieva <sup>1</sup>, Stéphane Cordier <sup>2</sup> and Nikolai G. Naumov <sup>1,\*</sup>

<sup>1</sup> Nikolaev Institute of Inorganic Chemistry SB RAS, 3, Acad. Lavrentiev Ave., 630090 Novosibirsk, Russia; tanya.lappi2@gmail.com (T.I.L.); gayfulin@niic.nsc.ru (Y.M.G.); muravyeva@niic.nsc.ru (V.K.M.)

<sup>2</sup> UFR Sciences et Propriétés de la Matière, Université de Rennes, CNRS, Institut des Sciences Chimiques de Rennes (ISCR) UMR 6226, F-35000 Rennes, France; adele.renaud@univ-rennes1.fr (A.R.); carmelo.prestipino@univ-rennes1.fr (C.P.); stephane.cordier@univ-rennes1.fr (S.C.)

<sup>3</sup> Institut Jean Lamour, UMR 7198 CNRS, Université de Lorraine, F-54011 Nancy, France; pierric.lemoine@univ-lorraine.fr

<sup>4</sup> International Tomography Center SB RAS, 3A, Institutskaya Str., 630090 Novosibirsk, Russia; vadim.yanshole@tomo.nsc.ru

\* Correspondence: naumov@niic.nsc.ru

## EXAFS measurements and data fitting

Both data for Re-L3 edge and Mo K-edge has been fitted using a single E0 for each edge, and constrain the Mo–C and Re–C path to have the same Debye-Waller factor. The others constrain are induced by identity the Mo–Re distance is the same of Re–Mo.

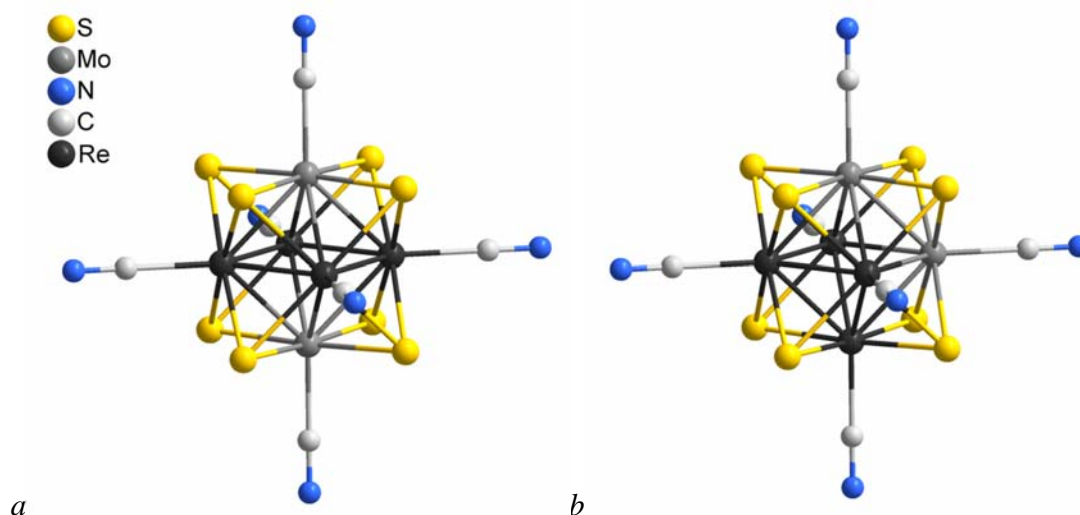

**Figure S1.** Cluster core isomerism in  $[\text{Re}_4\text{Mo}_2\text{S}_8(\text{CN})_6]$ : a) *trans*- $[\text{Re}_4\text{Mo}_2\text{S}_8(\text{CN})_6]$  b) *cis*- $[\text{Re}_4\text{Mo}_2\text{S}_8(\text{CN})_6]$  models used for data fitting

**Table S1.** Final fitting parameters of EXAFS spectra of  $(\text{Bu}_4\text{N})_4[\text{Re}_4\text{Mo}_2\text{S}_8(\text{CN})_6]$  (**4**) with *trans*- $[\text{Re}_4\text{Mo}_2\text{S}_8(\text{CN})_6]$  model.

| Mo K edge : k-range=3-19 R-range= 1–3 weight = 1,2,3 R-factor $k^2=0.00760$<br>$S_0^2 = 1.01(7)$                    |   |          |            |          |
|---------------------------------------------------------------------------------------------------------------------|---|----------|------------|----------|
|                                                                                                                     | N | R        | $\sigma^2$ | e0       |
| C                                                                                                                   | 1 | 2.18(3)  | 0.0005(2)  | 4.2(1.1) |
| S                                                                                                                   | 4 | 2.420(7) | 0.0024(1)  | 4.2(1.1) |
| Re                                                                                                                  | 4 | 2.644(3) | 0.0024(2)  | 4.2(1.1) |
| Re L <sub>3</sub> edge : k-range=2.9-17.8 R-range= 1.2–3 weight = 1,2,3 R-factor $k^2=0.02355$<br>$S_0^2 = 0.90(7)$ |   |          |            |          |
|                                                                                                                     | N | R        | $\sigma^2$ | e0       |
| C                                                                                                                   | 1 | 2.13(2)  | 0.0005(2)  | 6.8(8)   |
| S                                                                                                                   | 4 | 2.413(5) | 0.00254(6) | 6.8(8)   |
| Mo                                                                                                                  | 2 | 2.644(3) | 0.0021(2)  | 6.8(8)   |
| Re                                                                                                                  | 2 | 2.592(4) | 0.0021(3)  | 6.8(8)   |

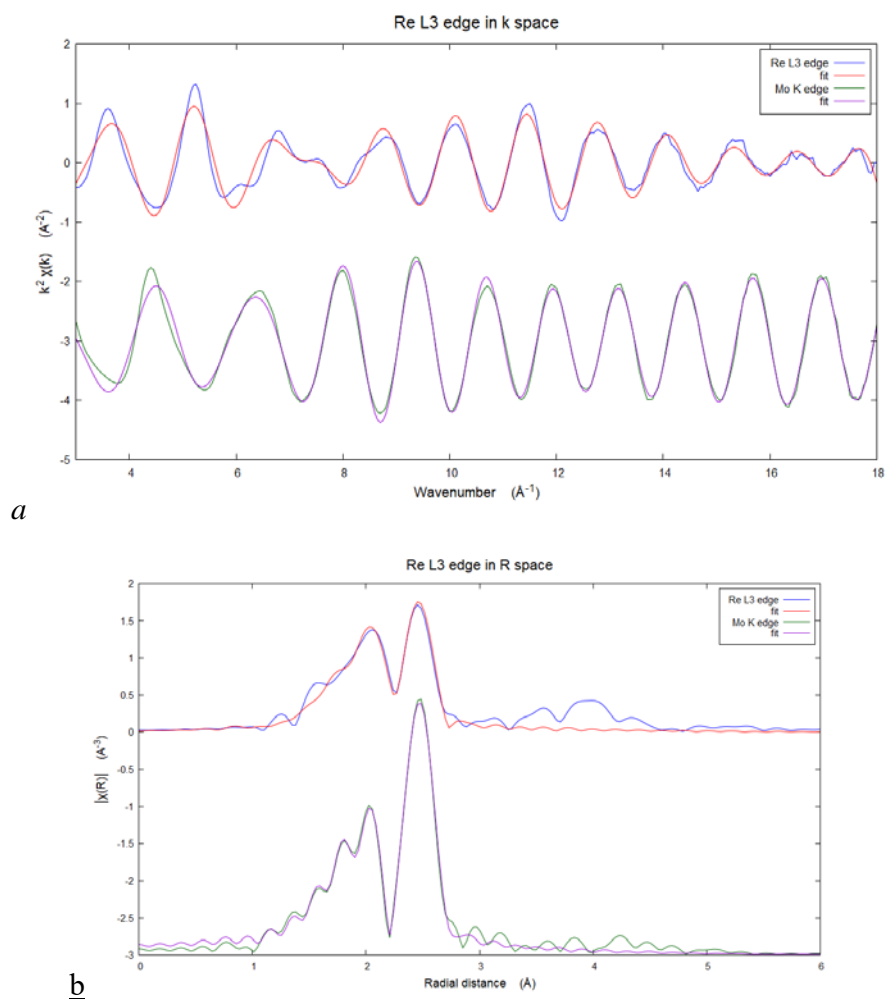

**Figure S2.** a) EXAFS measurements for  $(\text{Bu}_4\text{N})_4[\text{Re}_4\text{Mo}_2\text{S}_8(\text{CN})_6]$  (**4**) (weighted by  $k^2$ ), b) Fourier transform magnitudes. Re L3-edge experimental curves (blue), model fit with *trans*- $[\text{Re}_4\text{Mo}_2\text{S}_8(\text{CN})_6]$  (red); Mo K-edge experimental curve (green), model fit with *trans*- $[\text{Re}_4\text{Mo}_2\text{S}_8(\text{CN})_6]$  (purple).

**Table S2.** Final fitting parameters of EXAFS spectra of  $(\text{Bu}_4\text{N})_4[\text{Re}_4\text{Mo}_2\text{S}_8(\text{CN})_6]$  (**4**) with *cis*- $[\text{Re}_4\text{Mo}_2\text{S}_8(\text{CN})_6]$  model.

| Mo K edge : k-range=3-19 R-range= 1–3 weight = 1,2,3 R-factor $k^2=0.00531$<br>$S_0^2 = 094(7)$ |   |          |            |              |
|-------------------------------------------------------------------------------------------------|---|----------|------------|--------------|
|                                                                                                 | N | R        | $\sigma^2$ | $\epsilon_0$ |
| C                                                                                               | 1 | 2.13(3)  | 0.001(2)   | 4.6(1.0)     |
| S                                                                                               | 4 | 2.419(5) | 0.0026(5)  | 4.6(1.0)     |
| Re                                                                                              | 3 | 2.644(3) | 0.0017(2)  | 4.6(1.0)     |
| Mo                                                                                              | 1 | 2.80(3)  | 0.005(3)   | 4.6(1.0)     |

| Re L <sub>3</sub> edge : k-range=2.9-17.8 R-range= 1.2-3 weight = 1,2,3 R-factor k <sup>2</sup> =0.02759<br>S <sub>0</sub> <sup>2</sup> = 0.90(7) |   |          |                |                |
|---------------------------------------------------------------------------------------------------------------------------------------------------|---|----------|----------------|----------------|
|                                                                                                                                                   | N | R        | σ <sup>2</sup> | e <sub>0</sub> |
| C                                                                                                                                                 | 1 | 2.20(5)  | 0.001(2)       | 8.8(8)         |
| S                                                                                                                                                 | 4 | 2.413(5) | 0.00254(6)     | 8.8(8)         |
| Mo                                                                                                                                                | 2 | 2.644(3) | 0.0017(2)      | 8.8(8)         |
| Re                                                                                                                                                | 2 | 2.593(4) | 0.0027(4)      | 8.8(8)         |

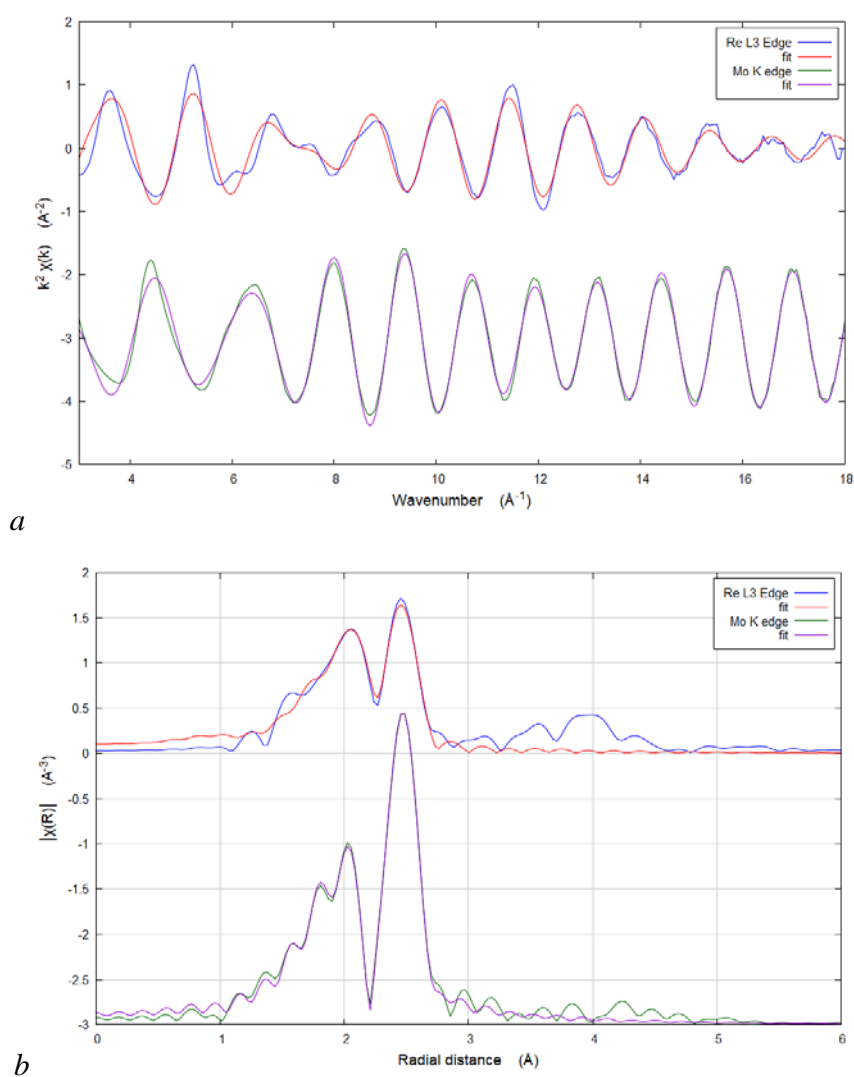

**Figure S3.** a) EXAFS measurements for (Bu<sub>4</sub>N)<sub>4</sub>[Re<sub>4</sub>Mo<sub>2</sub>S<sub>8</sub>(CN)<sub>6</sub>] (**4**) (weighted by k<sup>2</sup>), b) Fourier transform magnitudes. Re L<sub>3</sub>-edge experimental curves (blue), model fit with *cis*-[Re<sub>4</sub>Mo<sub>2</sub>S<sub>8</sub>(CN)<sub>6</sub>] (red); Mo K-edge experimental curve (green), model fit with *cis*-[Re<sub>4</sub>Mo<sub>2</sub>S<sub>8</sub>(CN)<sub>6</sub>] (purple).

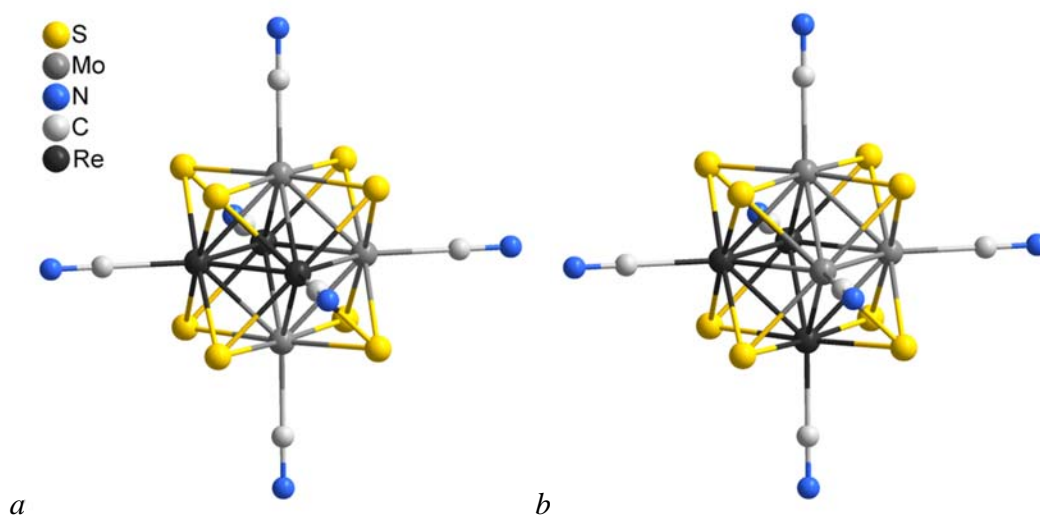

**Figure S4.** Cluster core isomerism in  $[\text{Re}_3\text{Mo}_3\text{S}_8(\text{CN})_6]$ : a) *mer*- $[\text{Re}_3\text{Mo}_3\text{S}_8(\text{CN})_6]$  b) *fac*- $[\text{Re}_3\text{Mo}_3\text{S}_8(\text{CN})_6]$  models used for data fitting.

**Table S3.** Final fitting parameters of the EXAFS spectra of  $\text{K}_5[\text{Re}_3\text{Mo}_3\text{S}_8(\text{CN})_6]$  (**5**) with *fac*- $[\text{Re}_3\text{Mo}_3\text{S}_8(\text{CN})_6]$  model.

| Mo K edge : k-range=3-19 R-range= 1–3 weight = 1,2,3 R-factor $k^2=0.00760$<br>$S_0^2 = 0.91 (1)$                   |   |          |            |        |
|---------------------------------------------------------------------------------------------------------------------|---|----------|------------|--------|
|                                                                                                                     | N | R        | $\sigma^2$ | $e_0$  |
| C                                                                                                                   | 1 | 2.17(7)  | 0.00100    | 0.8(9) |
| S                                                                                                                   | 4 | 2.45(1)  | 0.0036(1)  | 0.8(9) |
| Mo                                                                                                                  | 2 | 2.75(2)  | 0.0026(8)  | 0.8(9) |
| Re                                                                                                                  | 2 | 2.630(6) | 0.0020(5)  | 0.8(9) |
| Re L <sub>3</sub> edge : k-range=2.9-17.8 R-range= 1.2–3 weight = 1,2,3 R-factor $k^2=0.02355$<br>$S_0^2 = 0.88(6)$ |   |          |            |        |
|                                                                                                                     | N | R        | $\sigma^2$ | $e_0$  |
| C                                                                                                                   | 1 | 2.11(3)  | 0.00100    | 5.8(9) |
| S                                                                                                                   | 4 | 2.407(6) | 0.0023(5)  | 5.8(9) |
| Mo                                                                                                                  | 2 | 2.630(6) | 0.0020(5)  | 5.8(9) |
| Re                                                                                                                  | 2 | 2.608(4) | 0.0015(5)  | 5.8(9) |

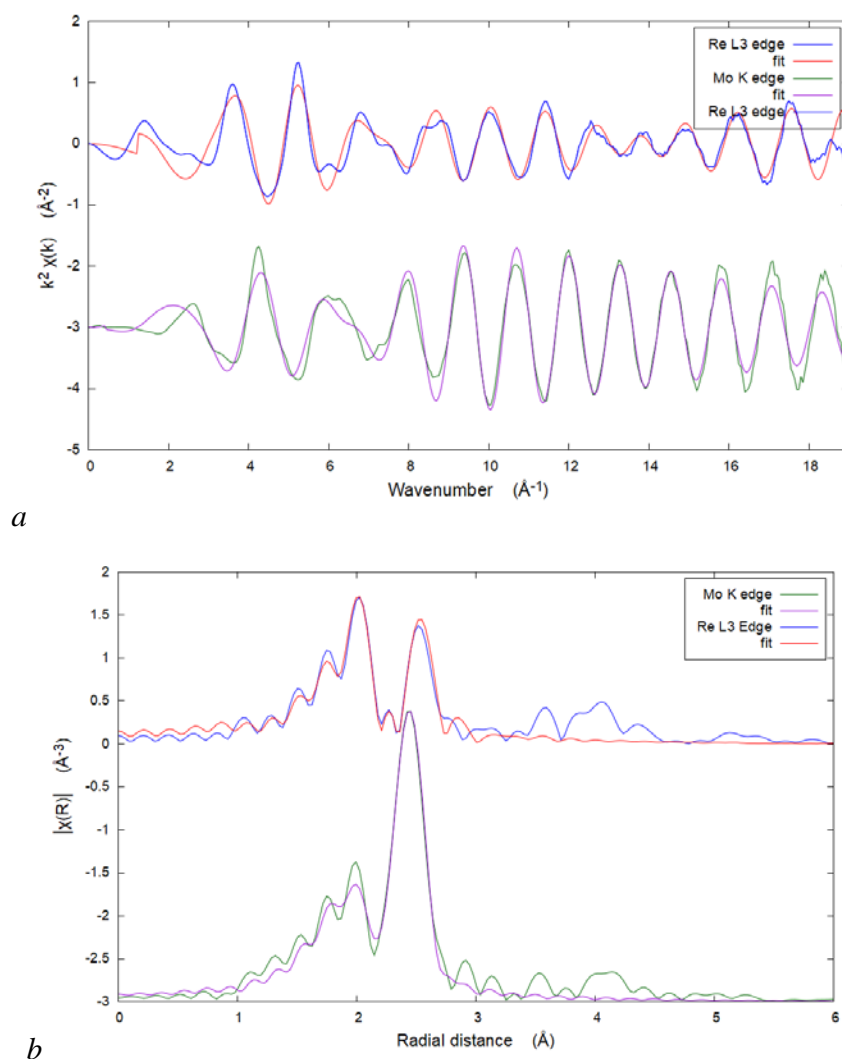

**Figure S5.** a) EXAFS measurements for  $K_5[Re_3Mo_3S_8(CN)_6]$  (**5**) (weighted by  $k^2$ ), b) Fourier transform magnitudes. Re L3-edge experimental curves (blue), model fit with *fac*- $[Re_3Mo_3S_8(CN)_6]$  (red); Mo K-edge experimental curve (green), model fit with *fac*- $[Re_3Mo_3S_8(CN)_6]$  (purple).

**Table S4.** Final fitting parameters of the EXAFS spectra of  $\text{K}_5[\text{Re}_3\text{Mo}_3\text{S}_8(\text{CN})_6]$  (**5**) with *mer*- $[\text{Re}_3\text{Mo}_3\text{S}_8(\text{CN})_6]$  model.

| Mo K edge : k-range=3-19 R-range= 1–3 weight = 1,2,3 R-factor $k^2=0.00760$<br>$S_0^2 = 1.33$ (1)                    |       |          |            |         |
|----------------------------------------------------------------------------------------------------------------------|-------|----------|------------|---------|
|                                                                                                                      | N     | R        | $\sigma^2$ | $e_0$   |
| C                                                                                                                    | 1     | 2.13(5)  | 0.001      | 0.08(9) |
| S                                                                                                                    | 4     | 2.457(8) | 0.0062(5)  | 0.08(9) |
| Re                                                                                                                   | 2.667 | 2.642(5) | 0.0042(7)  | 0.08(9) |
| Mo                                                                                                                   | 1.333 | 2.741(3) | 0.0010(8)  | 0.08(9) |
| Re L <sub>3</sub> edge : k-range=2.9-17.8 R-range= 1.2–3 weight = 1,2,3 R-factor $k^2=0.02355$<br>$S_0^2 = 0.88$ (6) |       |          |            |         |
|                                                                                                                      | N     | R        | $\sigma^2$ | $e_0$   |
| C                                                                                                                    | 1     | 2.12(3)  | 0.001      | 6.8(9)  |
| S                                                                                                                    | 4     | 2.41(1)  | 0.0021(6)  | 6.8(9)  |
| Mo                                                                                                                   | 2.667 | 2.642(5) | 0.0042(5)  | 6.8(9)  |
| Re                                                                                                                   | 1.333 | 2.612(6) | 0.0010(7)  | 6.8(9)  |

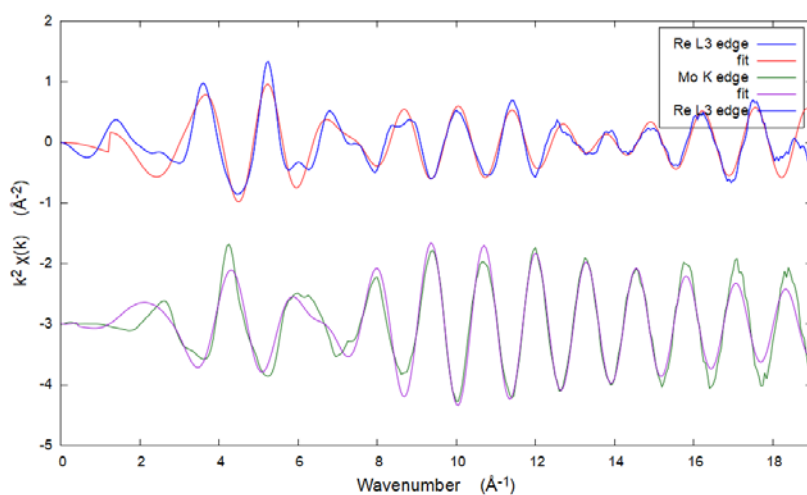

*a*

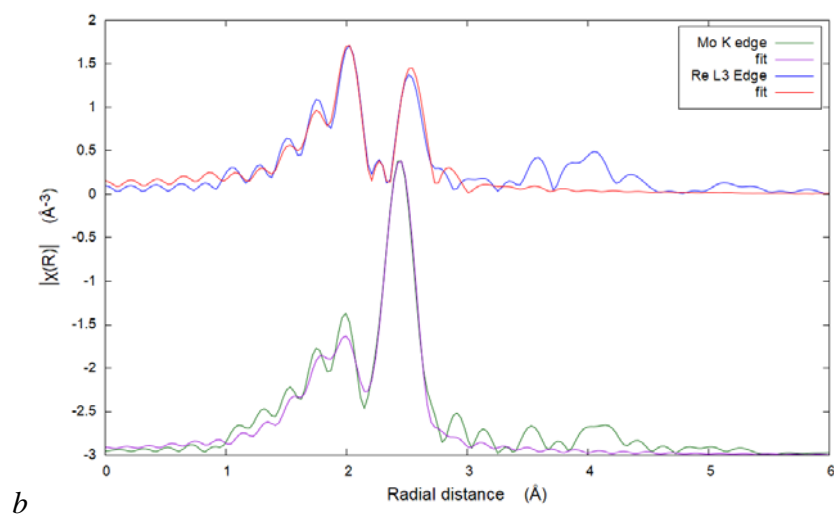

**Figure S6.** a) EXAFS measurements for  $\text{K}_5[\text{Re}_3\text{Mo}_3\text{S}_8(\text{CN})_6]$  (**5**) (weighted by  $k^2$ ), b) Fourier transform magnitudes. Re L3-edge experimental curves (blue), model fit with *mer*- $[\text{Re}_3\text{Mo}_3\text{S}_8(\text{CN})_6]$  (red); Mo K-edge experimental curve (green), model fit with *mer*- $[\text{Re}_3\text{Mo}_3\text{S}_8(\text{CN})_6]$  (purple).

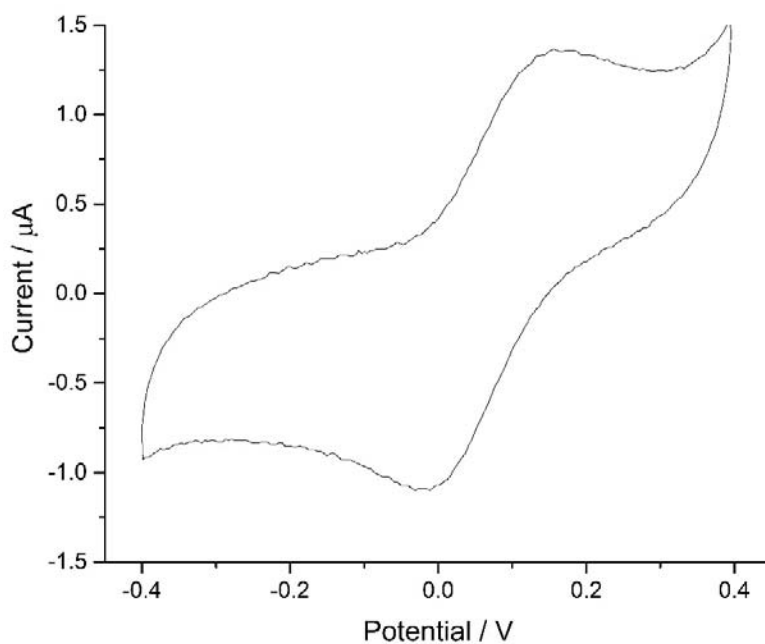

**Figure S7.** Cyclic voltammetry curve for the  $\text{K}_5[\text{Re}_4\text{Mo}_2\text{S}_8(\text{CN})_6]$  salt in aqueous solution vs Ag/AgCl reference electrode. Scan rate was  $50 \text{ mV} \cdot \text{s}^{-1}$ .
